# Supplementary material for: X-ray photoelectron spectroscopy of metal oxide nanoparticles: chemical composition, oxidation state and functional group content
Source: Royal Society of Chemistry journal article supplement (doi:10.1039/d4na00943f), 2025-01-01
Supplement: d4na00943f1.pdf [file d4na00943f1.pdf]

## Supporting Information

### X-ray Photoelectron Spectroscopy of Metal Oxide Nanoparticles: Oxidation State, Functional Group Content and Impurities

Gregory P. Lopinski<sup>1,\*</sup>, Oltion Kodra,<sup>2</sup> Filip Kunc,<sup>1</sup> David Kennedy,<sup>1</sup> Martin Couillard,<sup>2</sup> Linda J. Johnston,<sup>1</sup>

<sup>1</sup>Metrology Research Centre, National Research Council Canada, Ottawa, ON, Canada K1A 0R6

<sup>2</sup>Clean Energy Innovation Research Centre, National Research Council Canada, Ottawa, ON, Canada K1A 0R6

**Table S1.** Atomic composition data obtained from high resolution scans of NiO NPs. The bold number is the average of 3 measurements on the sample with the number below the standard deviation. Blank entries indicate no peak was observed above the background. A group of samples of the same size from the same supplier are indicated by the shaded region.

|                  | Ni 2p       | O 1s        | C 1s        | N 1s        | Si 2p      | Ni/O        | C/Ni        |
|------------------|-------------|-------------|-------------|-------------|------------|-------------|-------------|
| <b>Ni-01</b>     | <b>37.4</b> | <b>50.3</b> | <b>12.2</b> |             |            | <b>0.74</b> | <b>0.33</b> |
| Skyspring, bare  | 0.9         | 0.4         | 0.6         |             |            | 0.02        | 0.02        |
| <b>Ni-02</b>     | <b>46.7</b> | <b>43.8</b> | <b>9.5</b>  |             |            | <b>1.07</b> | <b>0.20</b> |
| mkNano, bare     | 1.1         | 0.8         | 0.3         |             |            | 0.04        | 0.01        |
| <b>Ni-03</b>     | <b>49.3</b> | <b>42.6</b> | <b>8.0</b>  | <b>0.10</b> |            | <b>1.16</b> | <b>0.16</b> |
| Sigma, bare      | 0.7         | 0.7         | 0.1         | 0.05        |            | 0.04        | 0.003       |
| <b>Ni-04</b>     | <b>45.1</b> | <b>42.9</b> | <b>11.8</b> | <b>0.2</b>  |            | <b>1.05</b> | <b>0.26</b> |
| USRN, bare       | 1.5         | 0.7         | 0.8         | 0.1         |            | 0.05        | 0.03        |
| <b>Ni-04-NRC</b> | <b>27.4</b> | <b>33.3</b> | <b>35.7</b> | <b>3.7</b>  |            | <b>0.82</b> | <b>1.33</b> |
| USRN, PVP        | 2.8         | 1.7         | 3.6         | 0.4         |            | 0.07        | 0.28        |
| <b>Ni-05</b>     | <b>41.8</b> | <b>42.3</b> | <b>15.0</b> | <b>0.8</b>  |            | <b>0.99</b> | <b>0.36</b> |
| USRN, PVP        | 1.3         | 0.4         | 1.2         | 0.1         |            | 0.03        | 0.04        |
| <b>Ni-06</b>     | <b>15.2</b> | <b>24.4</b> | <b>60.4</b> |             |            | <b>0.62</b> | <b>3.99</b> |
| USRN, SA         | 0.4         | 0.6         | 0.9         |             |            | 0.02        | 0.17        |
| <b>Ni-07</b>     | <b>18.2</b> | <b>36.9</b> | <b>32.5</b> | <b>6.2</b>  | <b>6.2</b> | <b>0.49</b> | <b>1.81</b> |
| USRN, APTES      | 2.0         | 1.4         | 1.5         | 0.2         | 0.4        | 0.07        | 0.27        |
| <b>Ni-08</b>     | <b>42.9</b> | <b>43.0</b> | <b>14.1</b> |             |            | <b>1.00</b> | <b>0.33</b> |
| USRN, bare       | 0.2         | 0.3         | 0.4         |             |            | 0.01        | 0.01        |

**Table S2.** Atomic composition data obtained from high resolution scans of Fe<sub>2</sub>O<sub>3</sub> NPs. The bold number is the average of 3 measurements on the sample with the number below the standard deviation. Blank entries indicate no peak was observed above the background. A group of samples of the same size from the same supplier are indicated by the shaded region.

|                             | Fe 2p              | O 1s               | C 1s               | N 1s               | Si 2s             | Fe/O                 | C/Fe                |
|-----------------------------|--------------------|--------------------|--------------------|--------------------|-------------------|----------------------|---------------------|
| <b>Fe-01</b><br>Sigma, bare | <b>36.4</b><br>1.2 | <b>45.4</b><br>1.5 | <b>18.2</b><br>1.2 |                    |                   | <b>0.80</b><br>0.05  | <b>0.50</b><br>0.04 |
| <b>Fe-02</b><br>USRN, bare  | <b>33.8</b><br>1.1 | <b>45.6</b><br>0.5 | <b>20.6</b><br>0.5 |                    |                   | <b>0.74</b><br>0.03  | <b>0.61</b><br>0.03 |
| <b>Fe-03</b><br>USRN,PVP    | <b>33.5</b><br>0.4 | <b>44.8</b><br>0.3 | <b>21.3</b><br>0.1 | <b>0.3</b><br>0.1  |                   | <b>0.75</b><br>0.02  | <b>0.64</b><br>0.01 |
| <b>Fe-04</b><br>USRN, NH2   | <b>29.2</b><br>0.5 | <b>45.0</b><br>0.7 | <b>25.1</b><br>0.8 | <b>0.7</b><br>0.06 |                   | <b>0.65</b><br>0.02  | <b>0.86</b><br>0.04 |
| <b>Fe-05</b><br>USRN, APTES | <b>29.3</b><br>1.7 | <b>44.8</b><br>0.8 | <b>21.7</b><br>0.7 | <b>2.3</b><br>0.1  | <b>2.0</b><br>0.1 | <b>0.65</b><br>0.05  | <b>0.74</b><br>0.07 |
| <b>Fe-06</b><br>USRN, SA    | <b>9.5</b><br>0.2  | <b>30.3</b><br>0.3 | <b>60.2</b><br>0.4 |                    |                   | <b>0.31</b><br>0.004 | <b>6.35</b><br>0.09 |
| <b>Fe-07</b><br>Lanxess     | <b>18.4</b><br>2.1 | <b>55.6</b><br>0.6 | <b>16.8</b><br>2.5 |                    | <b>9.2</b><br>0.7 | <b>0.33</b><br>0.04  | <b>0.93</b><br>0.24 |

**Table S3.** Atomic composition data obtained from high resolution scans of CeO<sub>2</sub> NPs. The bold number is the average of 3 measurements on the sample with the number below the standard deviation. Blank entries indicate no peak was observed above the background. A group of samples of the same size from the same supplier are indicated by the shaded region. For Ce-10 HR scans were only obtained for one area.

|                                  | Ce 3d              | O 1s               | C 1s               | N 1s              | Si 2s             | Ce/O                | C/Ce                       | %Ce+4              |
|----------------------------------|--------------------|--------------------|--------------------|-------------------|-------------------|---------------------|----------------------------|--------------------|
| <b>Ce-01</b><br>USRN, bare       | <b>25.5</b><br>2.1 | <b>53.3</b><br>2.8 | <b>21.1</b><br>4.9 |                   |                   | <b>0.48</b><br>0.01 | <b>0.84</b><br>0.25        | <b>80.7</b><br>2.4 |
| <b>Ce-02</b><br>USRN, bare       | <b>21.6</b><br>0.7 | <b>50.2</b><br>0.8 | <b>28.2</b><br>1.0 |                   |                   | <b>0.43</b><br>0.02 | <b>1.31</b><br>0.08        | <b>79.6</b><br>2.7 |
| <b>Ce-03</b><br>USRN, bare       | <b>31.6</b><br>0.8 | <b>59.9</b><br>1.4 | <b>8.5</b><br>0.7  |                   |                   | <b>0.53</b><br>0.03 | <b>0.27</b><br>0.01        | <b>71.7</b><br>2.4 |
| <b>Ce-03-NRC</b><br>USRN, SA@NRC | <b>10.6</b><br>0.6 | <b>33.2</b><br>0.6 | <b>56.2</b><br>1.0 |                   |                   | <b>0.32</b><br>0.02 | <b>5.29</b><br>0.38        | <b>71.9</b><br>1.6 |
| <b>Ce-04</b><br>USRN, PVP        | <b>29.5</b><br>0.5 | <b>57.5</b><br>0.5 | <b>13.1</b><br>0.3 |                   |                   | <b>0.51</b><br>0.01 | <b>0.44</b><br><b>0.01</b> | <b>73.6</b><br>2.0 |
| <b>Ce-05</b><br>USRN, SA         | <b>12.3</b><br>0.8 | <b>33.1</b><br>1.7 | <b>54.6</b><br>2.6 |                   |                   | <b>0.37</b><br>0.01 | <b>4.42</b><br>0.44        | <b>77.9</b><br>1.4 |
| <b>Ce-06</b><br>NAM, bare        | <b>18.4</b><br>0.4 | <b>58.6</b><br>1.1 | <b>23.0</b><br>1.3 |                   |                   | <b>0.31</b><br>0.01 | <b>1.10</b><br>0.05        | <b>41.5</b><br>1.6 |
| <b>Ce-07</b><br>mkNano, bare     | <b>18.9</b><br>0.7 | <b>48.7</b><br>0.8 | <b>32.4</b><br>1.2 |                   |                   | <b>0.39</b><br>0.01 | <b>1.72</b><br>0.13        | <b>76.9</b><br>0.9 |
| <b>Ce-08</b><br>mkNano, bare     | <b>29.2</b><br>1.9 | <b>59.1</b><br>0.5 | <b>11.7</b><br>1.4 |                   |                   | <b>0.49</b><br>0.04 | <b>0.40</b><br>0.07        | <b>72.1</b><br>4.4 |
| <b>Ce-09</b><br>USRN, APTES      | <b>12.3</b><br>0.7 | <b>43.4</b><br>1.2 | <b>29.8</b><br>0.9 | <b>5.9</b><br>0.4 | <b>8.6</b><br>0.5 | <b>0.28</b><br>0.01 | <b>2.42</b><br>0.21        | <b>62.3</b><br>2.4 |
| <b>Ce-10</b><br>USRN, PVP        | <b>23.0</b>        | <b>51.0</b>        | <b>25.4</b>        | <b>0.6</b>        |                   | <b>0.45</b>         | <b>1.10</b>                |                    |

**Table S4.** Atomic composition data obtained from high resolution scans of Mn<sub>2</sub>O<sub>3</sub> NPs. The bold number is the average of 3 measurements on the sample with the number below the standard deviation. Blank entries indicate no peak was observed above the background. A group of samples of the same size from the same supplier are indicated by the shaded region.

|                                 | <b>Mn 2p</b>       | <b>O 1s</b>        | <b>C 1s</b>        | <b>Mn/O</b>          | <b>C/Mn</b>         |
|---------------------------------|--------------------|--------------------|--------------------|----------------------|---------------------|
| <b>Mn-01</b><br>USRN, bare      | <b>18.8</b><br>0.6 | <b>38.9</b><br>0.6 | <b>42.3</b><br>1.2 | <b>0.48</b><br>0.01  | <b>2.25</b><br>0.14 |
| <b>Mn-02</b><br>USRN, PVP       | <b>17.4</b><br>0.5 | <b>37.2</b><br>0.7 | <b>45.4</b><br>1.1 | <b>0.47</b><br>0.006 | <b>2.62</b><br>0.13 |
| <b>Mn-03</b><br>USRN, SA        | <b>12.2</b><br>0.5 | <b>26.1</b><br>0.4 | <b>61.7</b><br>0.9 | <b>0.47</b><br>0.01  | <b>5.05</b><br>0.28 |
| <b>Mn-04</b><br>USRN, APTES     | <b>17.5</b><br>0.8 | <b>40.0</b><br>0.8 | <b>42.6</b><br>1.5 | <b>0.44</b><br>0.01  | <b>2.45</b><br>0.20 |
| <b>Mn-05</b><br>USRN, bare      | <b>20.0</b><br>1.3 | <b>40.1</b><br>1.6 | <b>39.9</b><br>2.8 | <b>0.50</b><br>0.01  | <b>2.00</b><br>0.26 |
| <b>Mn-06</b><br>mKNano, bare    | <b>18.0</b><br>0.4 | <b>38.6</b><br>0.1 | <b>43.4</b><br>0.3 | <b>0.47</b><br>0.01  | <b>2.42</b><br>0.07 |
| <b>Mn-07</b><br>Am. Elem., bare | <b>16.6</b><br>1.7 | <b>37.0</b><br>2.3 | <b>46.4</b><br>4.0 | <b>0.45</b><br>0.02  | <b>2.84</b><br>0.52 |
| <b>Mn-08</b><br>Nanografi, bare | <b>22.9</b><br>1.2 | <b>43.2</b><br>0.7 | <b>33.9</b><br>1.9 | <b>0.53</b><br>0.02  | <b>1.48</b><br>0.16 |

**Table S5.** Parameters (peak position and fractional contribution) obtained for the NiO samples by fitting five peaks in the Ni 2p<sub>3/2</sub> region, following the approach of Beisinger et al. (ref. 42). The bold values represent the average for spectra taken at three different points on the sample with the corresponding standard deviation shown in the line below. Note that only one point was measured on sample Ni-04. The last line in the table shows the fitting parameters for NiO in ref. 42.

|                       | <b>Peak 1</b><br>(eV) | <b>Peak 2</b><br>(eV) | <b>Peak 3</b><br>(eV) | <b>Peak 4</b><br>(eV) | <b>Peak 5</b><br>(eV) | <b>Peak 1</b><br>(%) | <b>Peak 2</b><br>(%) | <b>Peak 3</b><br>(%) | <b>Peak 4</b><br>(%) | <b>Peak 5</b><br>(%) |
|-----------------------|-----------------------|-----------------------|-----------------------|-----------------------|-----------------------|----------------------|----------------------|----------------------|----------------------|----------------------|
| <b>Ni-01</b>          | <b>853.9</b><br>0.0   | <b>855.6</b><br>0.1   | <b>861.0</b><br>0.0   | <b>864.1</b><br>0.0   | <b>866.5</b><br>0.0   | <b>11.2</b><br>0.4   | <b>45.4</b><br>0.3   | <b>34.8</b><br>0.2   | <b>4.9</b><br>0.2    | <b>3.8</b><br>0.1    |
| <b>Ni-02</b>          | <b>853.6</b><br>0.0   | <b>855.3</b><br>0.0   | <b>860.8</b><br>0.0   | <b>863.9</b><br>0.0   | <b>866.2</b><br>0.0   | <b>12.5</b><br>0.2   | <b>44.4</b><br>0.1   | <b>35.9</b><br>0.1   | <b>3.4</b><br>0.5    | <b>3.8</b><br>0.6    |
| <b>Ni-03</b>          | <b>853.5</b><br>0.1   | <b>855.2</b><br>0.1   | <b>860.7</b><br>0.1   | <b>863.9</b><br>0.0   | <b>866.1</b><br>0.1   | <b>11.7</b><br>0.3   | <b>45.2</b><br>0.5   | <b>35.9</b><br>0.4   | <b>3.7</b><br>0.3    | <b>3.6</b><br>0.1    |
| <b>Ni-04</b>          | <b>853.8</b>          | <b>855.6</b>          | <b>861.0</b>          | <b>864.1</b>          | <b>866.2</b>          | <b>11.8</b>          | <b>45.0</b>          | <b>36.6</b>          | <b>2.4</b>           | <b>4.2</b>           |
| <b>Ni-04-NRC</b>      | <b>853.3</b><br>0.1   | <b>855.1</b><br>0.1   | <b>860.5</b><br>0.0   | <b>863.6</b><br>0.0   | <b>865.9</b><br>0.0   | <b>11.6</b><br>0.6   | <b>45.7</b><br>0.9   | <b>36.5</b><br>1.0   | <b>3.2</b><br>0.7    | <b>3</b><br>0.6      |
| <b>Ni-05</b>          | <b>853.9</b><br>0.1   | <b>855.6</b><br>0.2   | <b>861.1</b><br>0.1   | <b>864.3</b><br>0.4   | <b>866.5</b><br>0.3   | <b>11.2</b><br>0.9   | <b>44.9</b><br>0.3   | <b>37.6</b><br>2.5   | <b>2.6</b><br>0.1    | <b>3.7</b><br>1.2    |
| <b>Ni-06</b>          | <b>853.9</b><br>0.0   | <b>856.0</b><br>0.1   | <b>860.2</b><br>0.2   | <b>863.7</b><br>0.1   | <b>866.9</b><br>0.2   | <b>6.9</b><br>0.3    | <b>46.6</b><br>2.9   | <b>31.4</b><br>3.9   | <b>13.9</b><br>1.8   | <b>1.0</b><br>0.6    |
| <b>Ni-07</b>          | <b>853.4</b><br>0.0   | <b>855.1</b><br>0.0   | <b>860.6</b><br>0.0   | <b>863.7</b><br>0.0   | <b>865.9</b><br>0.2   | <b>10.6</b><br>2.1   | <b>48.6</b><br>3.0   | <b>35.8</b><br>1.0   | <b>2.1</b><br>1.5    | <b>3.1</b><br>0.4    |
| <b>Ni-08</b>          | <b>853.5</b><br>0.0   | <b>855.3</b><br>0.0   | <b>860.7</b><br>0.0   | <b>863.9</b><br>0.1   | <b>866.1</b><br>0.1   | <b>12.8</b><br>0.4   | <b>43.8</b><br>0.3   | <b>36.6</b><br>0.2   | <b>2.8</b><br>0.1    | <b>4.1</b><br>0.4    |
| <b>NiO</b><br>Ref. 42 | <b>853.7</b>          | <b>855.4</b>          | <b>860.9</b>          | <b>864</b>            | <b>866.3</b>          | <b>14.3</b>          | <b>44.2</b>          | <b>34</b>            | <b>3.6</b>           | <b>3.9</b>           |

**Table S6.** Parameters (peak position and fractional contribution) obtained for the Fe<sub>2</sub>O<sub>3</sub> samples by fitting five peaks in the Fe 2p<sub>3/2</sub> region. The bold values represent the average for spectra taken at three different points on the sample with the corresponding standard deviation shown in the line below. Note that only one point was measured on sample Ni-04. The last line in the table shows the fitting parameters for Fe<sub>2</sub>O<sub>3</sub> from ref. 37.

|                                           | Peak 1<br>(eV)       | Peak 2<br>(eV)       | Peak 3<br>(eV)      | Peak 4<br>(eV)      | Peak 5<br>(eV)      | Peak 1<br>(%)      | Peak 2<br>(%)      | Peak<br>3(%)       | Peak 4<br>(%)      | Peak 5<br>(%)      |
|-------------------------------------------|----------------------|----------------------|---------------------|---------------------|---------------------|--------------------|--------------------|--------------------|--------------------|--------------------|
| Fe-01                                     | <b>709.9</b><br>0.1  | <b>711.0</b><br>0.2  | <b>711.9</b><br>0.3 | <b>712.9</b><br>0.4 | <b>713.8</b><br>0.5 | <b>38.3</b><br>4.1 | <b>29.5</b><br>1.5 | <b>17.1</b><br>1.7 | <b>8.3</b><br>1.1  | <b>6.8</b><br>4.1  |
| Fe-02                                     | <b>709.3</b><br>0.1  | <b>710.5</b><br>0.1  | <b>711.6</b><br>0.2 | <b>712.5</b><br>0.3 | <b>713.4</b><br>0.1 | <b>37.0</b><br>1.0 | <b>32.7</b><br>0.4 | <b>16.3</b><br>1.5 | <b>9.3</b><br>1.4  | <b>4.8</b><br>1.5  |
| Fe-03                                     | <b>709.3</b><br>0.1  | <b>710.5</b><br>0.1  | <b>711.5</b><br>0.2 | <b>712.5</b><br>0.3 | <b>713.5</b><br>0.5 | <b>28.9</b><br>3.9 | <b>29.2</b><br>2.6 | <b>20.0</b><br>2.4 | <b>11.0</b><br>0.6 | <b>11.0</b><br>4.0 |
| Fe-04                                     | <b>709.1</b><br>0.3  | <b>710.2</b><br>0.4  | <b>711.3</b><br>0.4 | <b>712.3</b><br>0.3 | <b>713.4</b><br>0.1 | <b>21.0</b><br>8.9 | <b>31.4</b><br>1.0 | <b>25.1</b><br>5.4 | <b>13.1</b><br>5.4 | <b>9.5</b><br>3.1  |
| Fe-05                                     | <b>709.4</b><br>0.5  | <b>710.6</b><br>0.5  | <b>711.5</b><br>0.4 | <b>712.4</b><br>0.5 | <b>713.0</b><br>0.5 | <b>33.9</b><br>1.2 | <b>29.9</b><br>3.1 | <b>16.5</b><br>1.0 | <b>8.9</b><br>1.6  | <b>9.8</b><br>5.4  |
| Fe-06                                     | <b>709.3</b><br>0.1  | <b>709.9</b><br>0.4  | <b>710.9</b><br>0.4 | <b>711.9</b><br>0.4 | <b>713.0</b><br>0.2 | <b>26.5</b><br>6.3 | <b>20.0</b><br>7.6 | <b>25.7</b><br>6.8 | <b>13.6</b><br>3.3 | <b>14.2</b><br>3.8 |
| Fe-07                                     | <b>709.8</b><br>0.03 | <b>710.9</b><br>0.04 | <b>711.8</b><br>0.1 | <b>712.7</b><br>0.1 | <b>713.6</b><br>0.1 | <b>30.3</b><br>1.4 | <b>28.3</b><br>0.8 | <b>17.6</b><br>0.7 | <b>9.2</b><br>0.1  | <b>14.6</b><br>2.6 |
| Fe <sub>2</sub> O <sub>3</sub><br>ref. 37 | <b>709.8</b>         | <b>710.8</b>         | <b>711.6</b>        | <b>712.7</b>        | <b>713.7</b>        | <b>26.8</b>        | <b>24.7</b>        | <b>18.9</b>        | <b>10.1</b>        | <b>10</b>          |

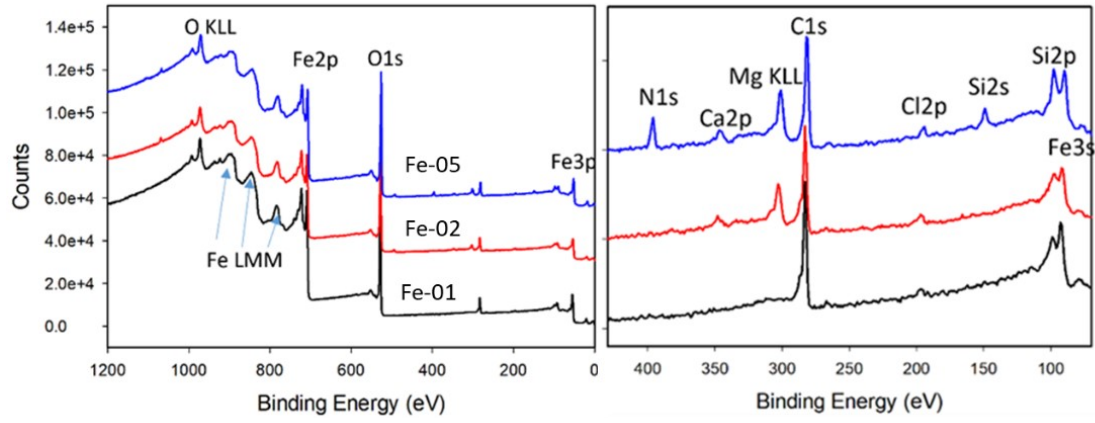

**Figure S1.** XPS survey data for two bare (Fe-01, Fe-02) and one APTES-modified (Fe-05) Fe<sub>2</sub>O<sub>3</sub> NP sample. The binding energy range from 430 to 70eV is shown with an expanded vertical scale on the right.

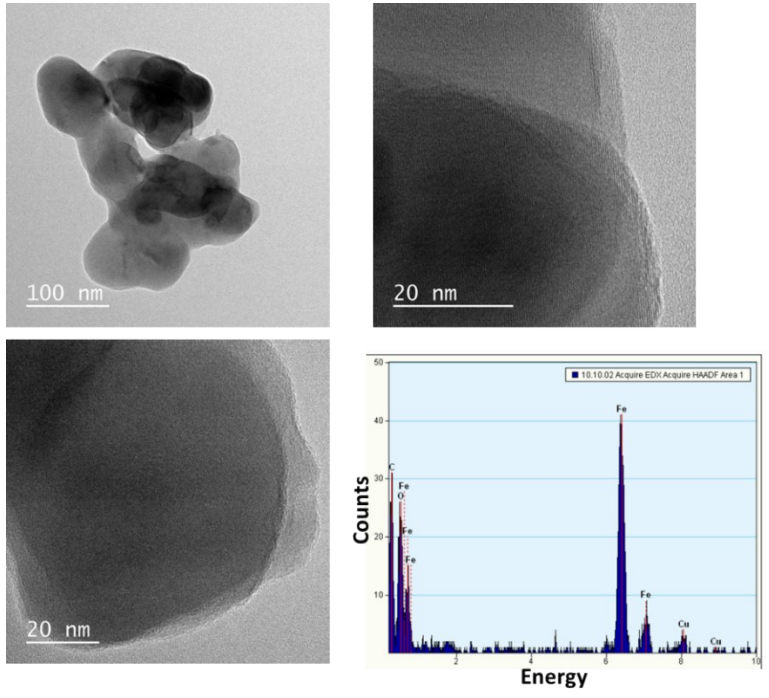

**Fig. S2.** TEM images of Fe-07. EDX scans show no evidence of silicon, which would be detected if the particles were composed of fayalite ( $\text{Fe}_2\text{SiO}_4$ ). However, a thin (1 nm)  $\text{SiO}_2$  layer coating the particles would likely not give a detectable Si signal.

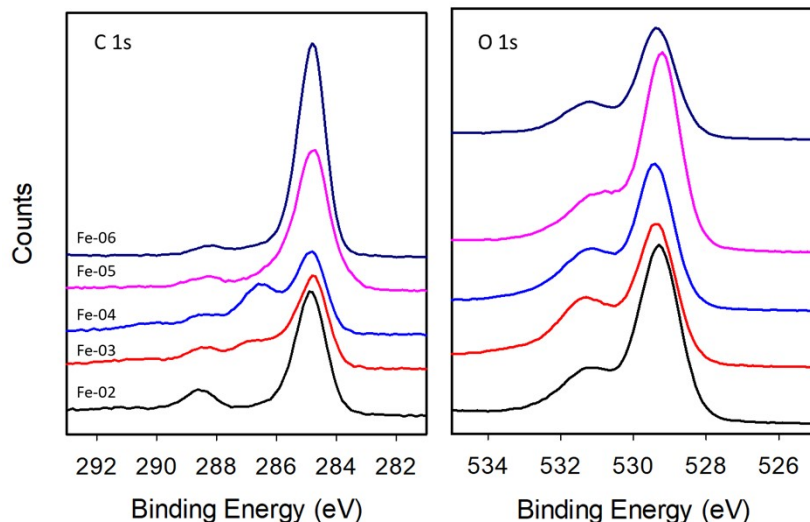

**Fig. S3.** HR spectra of the C 1s and O 1s regions for the bare  $\text{Fe}_2\text{O}_3$  nanoparticle sample Fe-02 and the four corresponding nanoparticle samples modified with PVP (Fe-03),  $\text{NH}_2$  (Fe-04), APTES (Fe-05) and SA (Fe-06). The C 1s regions shows some changes due to the different modifications although interpretation of these features is complicated by the presence of adventitious carbon seen on the bare particles. The O 1s region for all the samples is very similar as the strong signal from the  $\text{Fe}_2\text{O}_3$  particles dominates the spectra.

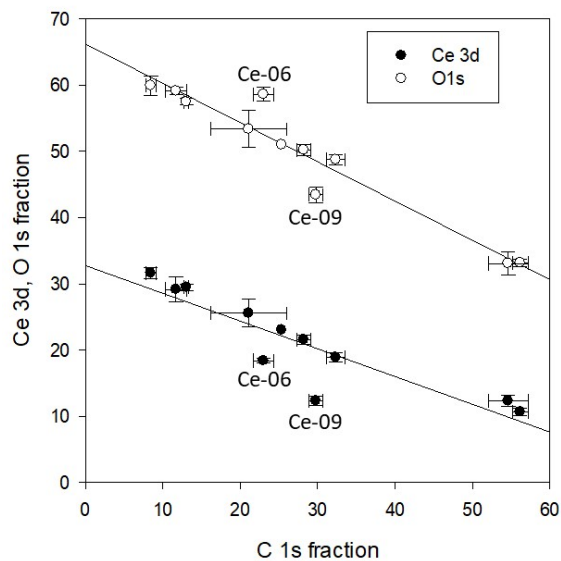

**Fig S4.** Ce 3d and O 1s fractions (based on HR data) as a function of the C 1s fraction for all the CeO<sub>2</sub> NPs. Outliers are labelled and correspond to sample Ce-06 which was unmodified but exhibited considerable P contamination and Ce-09 which was modified with APTES.

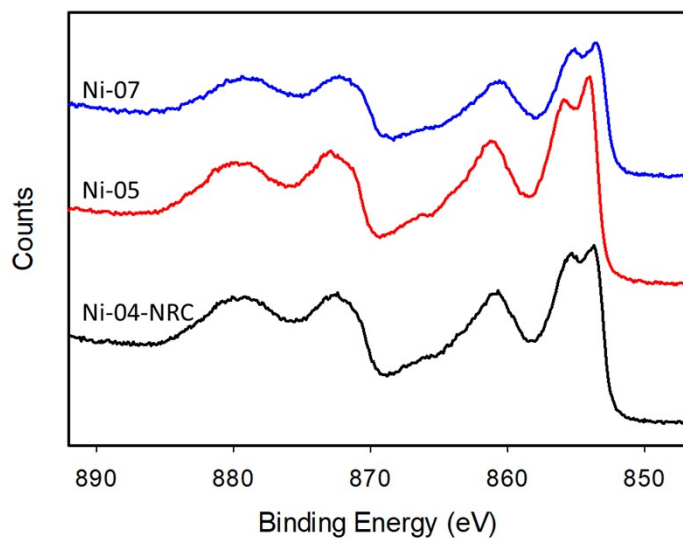

**Fig. S5.** Ni 2p region for three modified NiO nanoparticle samples. The three spectra are rather similar indicating that there are no significant changes in the oxidation state on these modified samples.

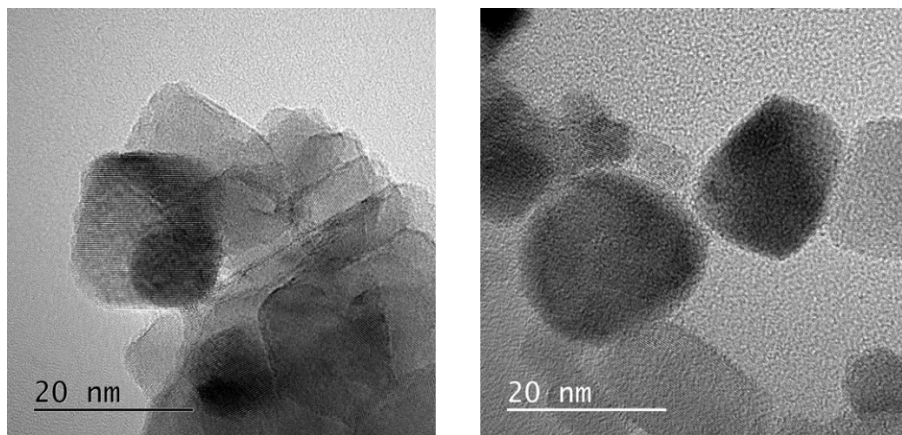

**Fig. S6.** TEM images of Ni-04 (left) and Ni-04-NRC (right). There is no evidence of a PVP layer coating the particles for Ni-04-NRC even though XPS shows evidence of PVP modification.
